# Supplementary material for: Heterointerface synergy between a 3 × 3 tunnel τ-MnO2 cathode and Mg2(OH)3Cl·4H2O for achieving long cycle-life aqueous zinc-ion batteries
Source: Royal Society of Chemistry journal article supplement (doi:10.1039/d4qi02572e), 2024-01-01
Supplement: d4qi02572e1.pdf [file d4qi02572e1.pdf]

## Electronic Supplementary Information

### **Heterointerface synergy between 3×3 tunnel $\tau$ -MnO<sub>2</sub> cathode and Mg<sub>2</sub>(OH)<sub>3</sub>Cl·4H<sub>2</sub>O achieving long-cycle life for aqueous zinc-ion battery**

Fang Xu<sup>a</sup>, Jialin Zheng<sup>a</sup>, Dai-Huo Liu<sup>a,b,\*</sup>, Ao Wang<sup>a</sup>, Zhenjiang Li<sup>a</sup>, Chunyan Xu<sup>a</sup>, Mengqin Song<sup>a</sup>, Beinuo Zhang<sup>a</sup>, Zhengyu Bai<sup>a,\*</sup> and Zhongwei Chen<sup>b,\*</sup>

<sup>a</sup> Key Laboratory of Green Chemical Media and Reactions, Ministry of Education Collaborative Innovation Center of Henan Province for Green Manufacturing of Fine Chemicals, School of Chemistry and Chemical Engineering, Henan Normal University Xinxiang 453007, Henan, P. R. China.

<sup>b</sup> State Key Laboratory of Catalysis, Power Battery & Systems Research Center, Dalian Institute of Chemical Physics, Chinese Academy of Sciences, Dalian, 110623, China.

Corresponding Authors: \*E-mail: [liudaihuo@htu.edu.cn](mailto:liudaihuo@htu.edu.cn), [baizhengyu@htu.edu.cn](mailto:baizhengyu@htu.edu.cn), [zwchen@dicp.ac.cn](mailto:zwchen@dicp.ac.cn).

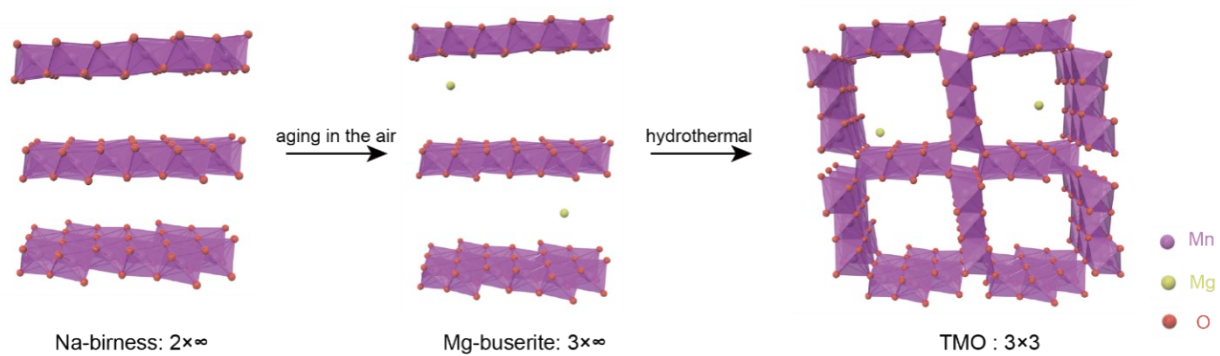

**Fig. S1.** Schematic illustration of the structural changes of TMO during preparation.

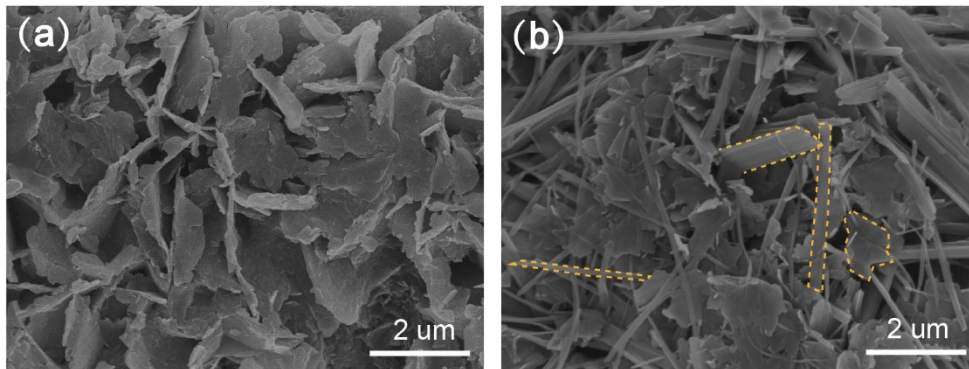

**Fig. S2.** SEM images of a) TMO-MOC heterostructure and b) TMO samples.

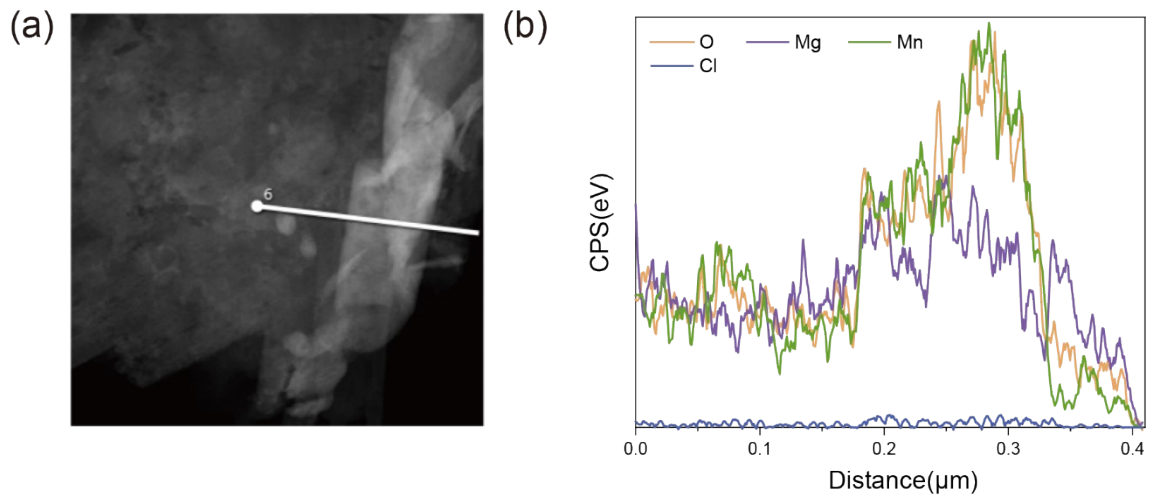

**Fig. S3.** (a) and (b) show the energy dispersive spectroscopy (EDS) of TMO-MOC heterostructure.

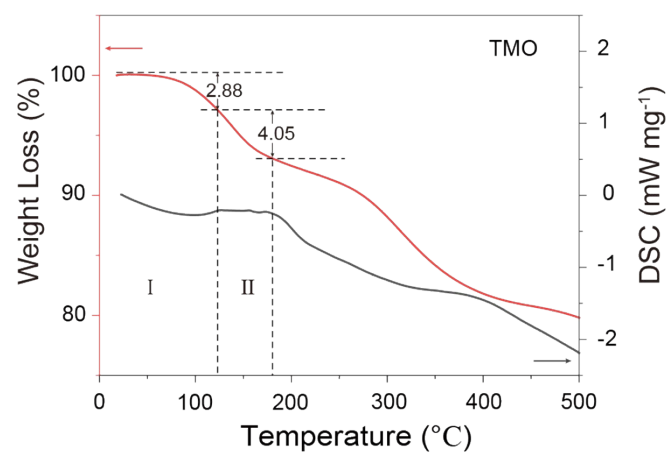

**Fig. S4.** TGA of TMO.

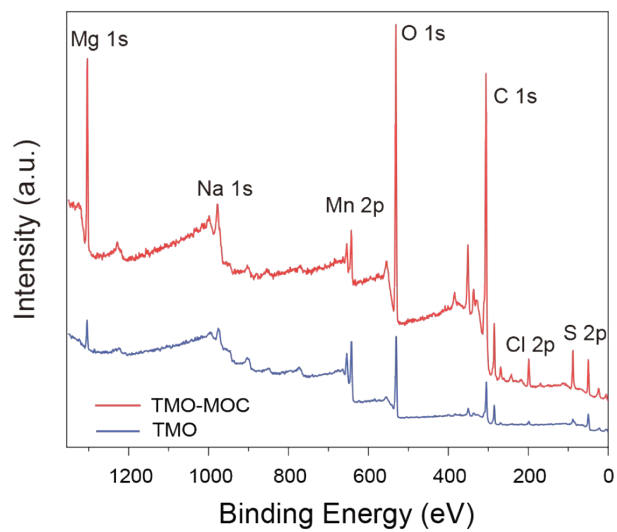

**Fig. S5.** XPS spectra of TMO-MOC heterostructure and TMO.

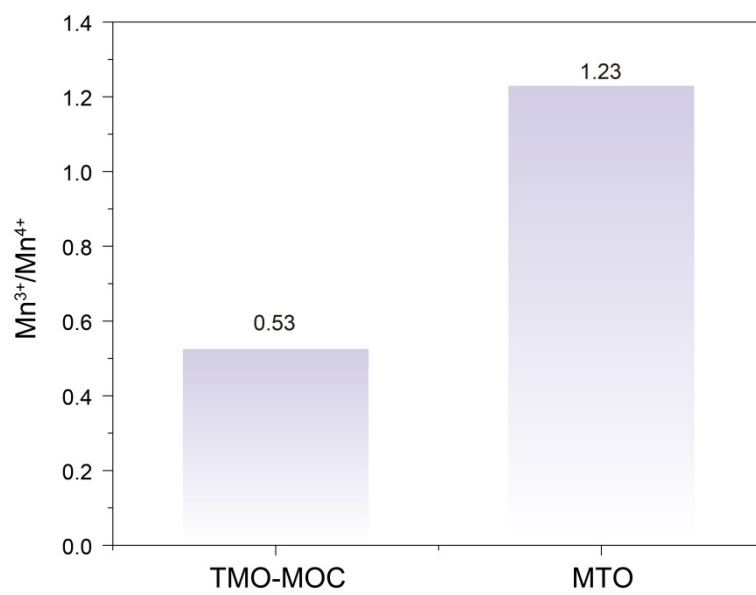

**Fig. S6.** The ratio of Mn<sup>3+</sup>/Mn<sup>4+</sup> in TMO-MOC heterostructure and TMO.

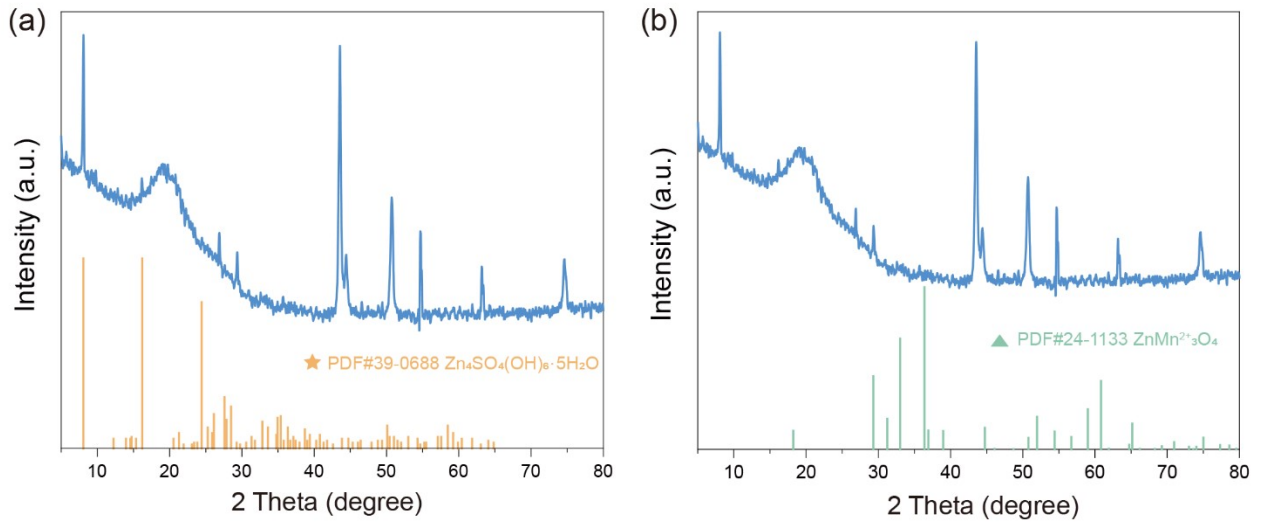

**Fig. S7.** (a,b) XRD of TMO-MOC heterostructure upon discharging to 0.9V.



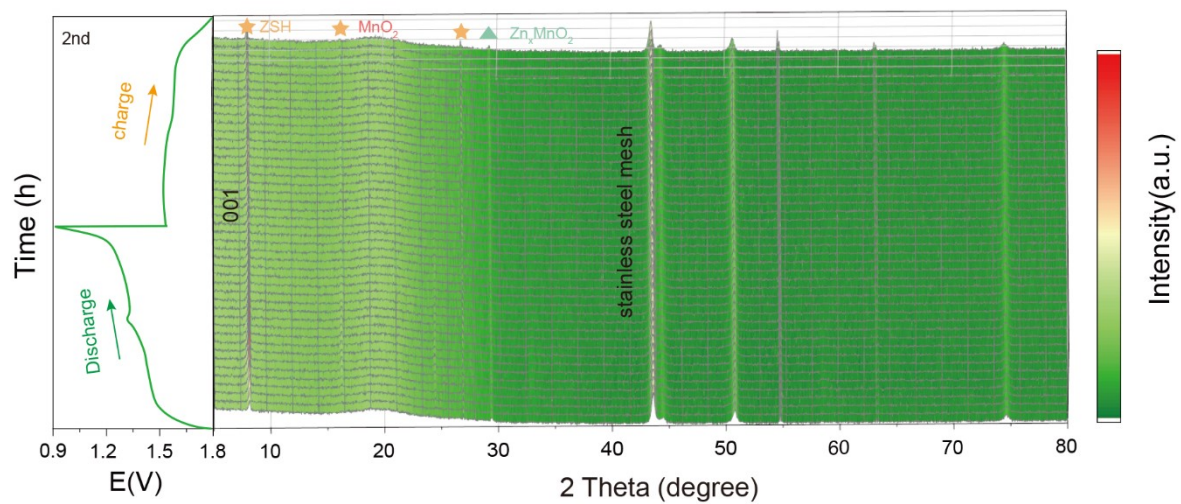

**Fig. S8.** *In-situ* XRD patterns in different discharge/charge states at  $0.1 \text{ A g}^{-1}$  of TMO-MOC heterostructure.

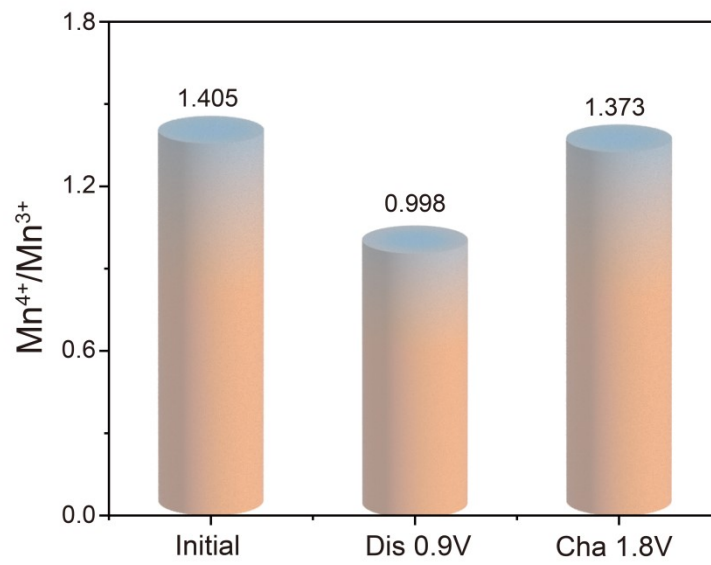

**Fig. S9.** The ratio of Mn<sup>4+</sup>/Mn<sup>3+</sup> in TMO-MOC heterostructure in different discharge/charge states.

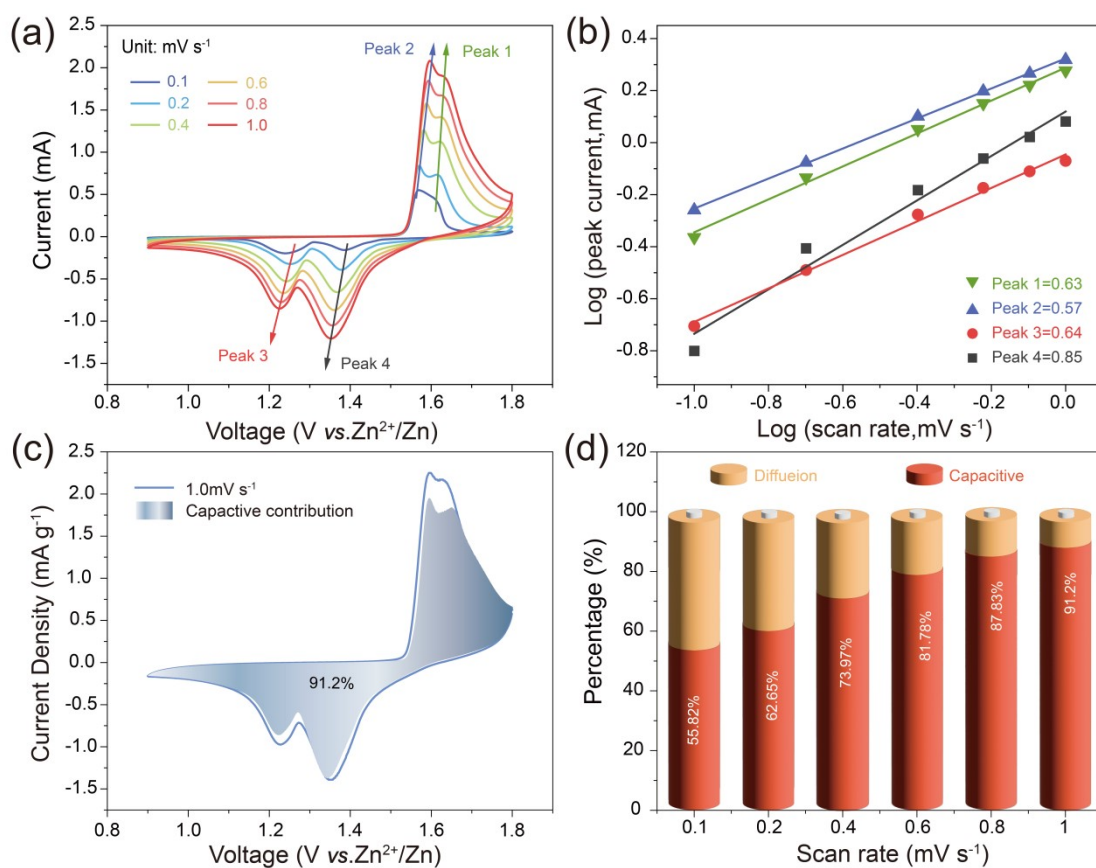

**Fig. S10.** Kinetics analyses of the electrochemical reactions in TMO. a) CV curves of the various scan rates, b)  $\log(i)$  versus  $\log(v)$  plots at different oxidation and reduction states, c) CV curve and pseudo capacitance contribution ratio at 1  $\text{mV s}^{-1}$  scanning speed, d) The ratio of capacitive contribution at different scan rate.

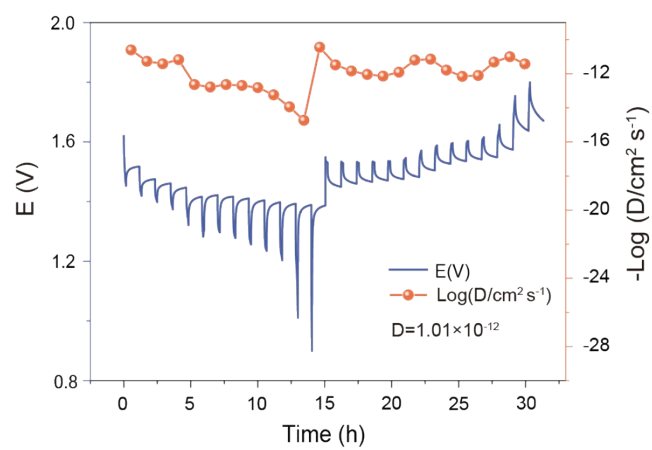

**Fig. S11.** GITT curve of TMO.

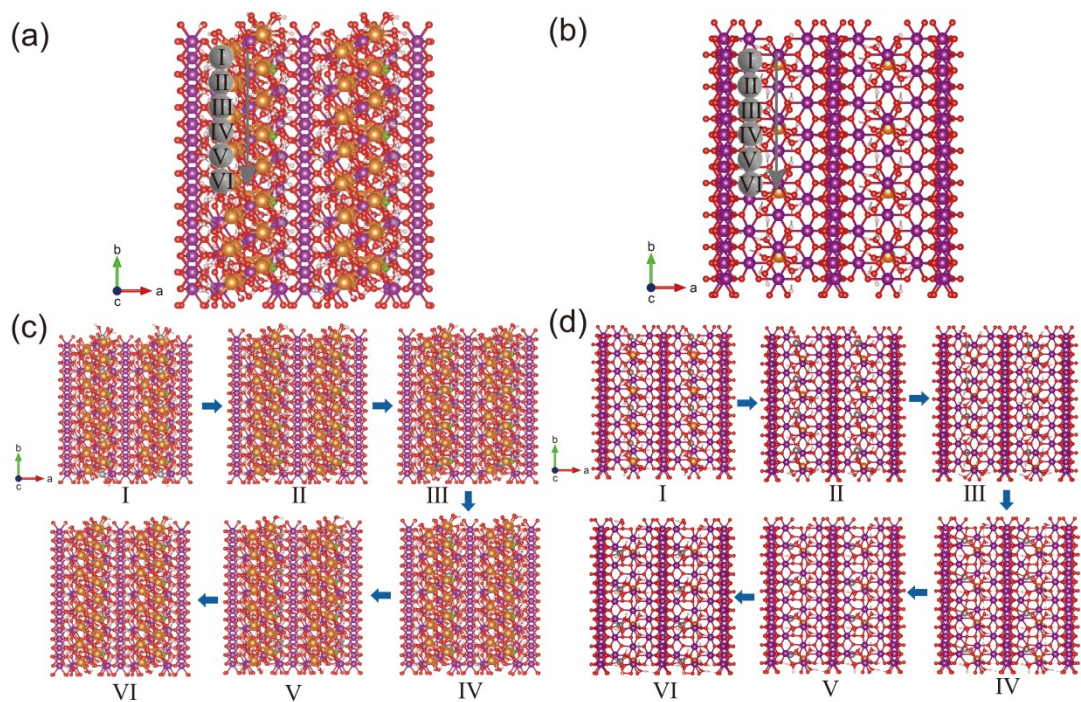

Fig. S12. Zn<sup>2+</sup> diffusion pathway after projection (a) in TMO-MOC and (b) in TMO.

The genuine diffusion pathway of Zn<sup>2+</sup> (c) in TMO-MOC and (d) in TMO.

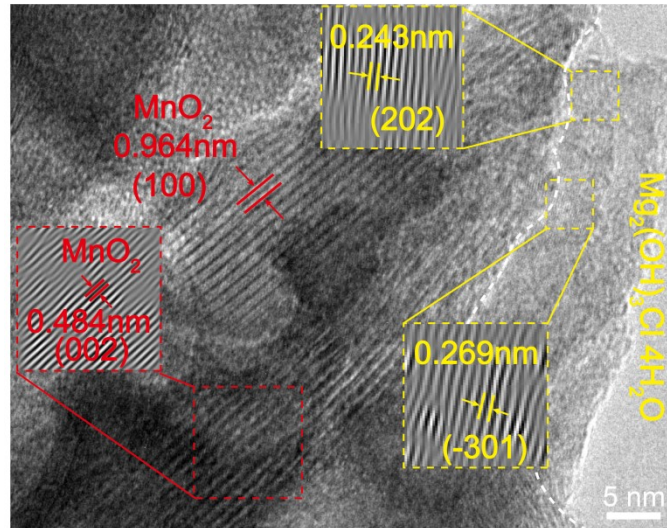

**Fig. S13 .** HRTEM of TMO-MOC heterostructure after 600 cycles.

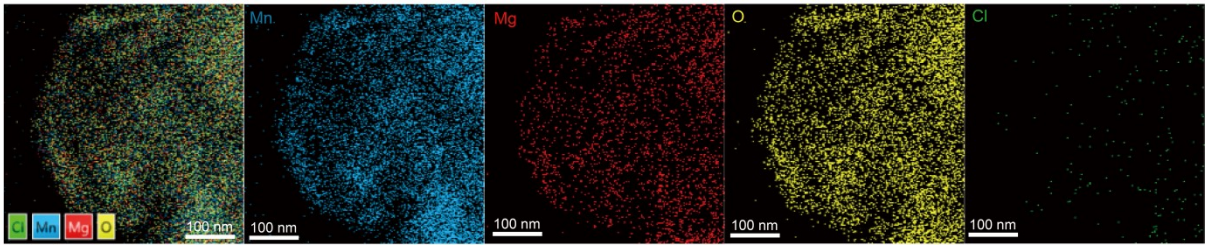

**Fig. S14 .** TEM elemental mapping of TMO-MOC heterostructure after 600 cycles.

**Table S1.** ICP-AES of TMO-MOC heterostructure and TMO.

---

|          | TMO-MOC | TMO  |
|----------|---------|------|
| Mn(mg/L) | 1       | 1    |
| Mg(mg/L) | 2.38    | 0.38 |

---



**Table S2.** XPS data of TMO-MOC heterostructure.

| Name | start BE | Peak position BE | end BE  | height CPS | FWHM eV |
|------|----------|------------------|---------|------------|---------|
| Mg1s | 1315.07  | 1303.31          | 1295.17 | 77440.79   | 2.23    |
| Mn2p | 665.03   | 642.41           | 630.23  | 13640.94   | 2.73    |
| O1s  | 545.07   | 531.25           | 525.17  | 91664.8    | 1.9     |
| C1s  | 295.07   | 284.8            | 275.17  | 17164.18   | 1.49    |
| Cl2p | 210.07   | 198.36           | 190.17  | 8172.4     | 2.62    |

**Table S3.** XPS data of TMO.

---

| Name | start BE | Peak position BE | end BE  | height CPS | FWHM eV |
|------|----------|------------------|---------|------------|---------|
| Mg1s | 1315.35  | 1304.04          | 1295.45 | 18271.85   | 1.93    |
| Mn2p | 665.31   | 642.19           | 630.51  | 23114.55   | 2.99    |
| O1s  | 545.35   | 529.96           | 525.45  | 34004.29   | 2.74    |
| C1s  | 295.35   | 284.8            | 275.45  | 9297.49    | 1.57    |
| Cl2p | 210.35   | 198.05           | 190.45  | 1916.76    | 1.74    |

---

**Table S4.** The electrochemical performances of TMO-MOC compared with other reported MnO<sub>x</sub> cathodes in AZIBs.

| Materials                                                           | First Cycle Capacity<br>(mAh g <sup>-1</sup> )     | Cycle Numbers<br>[at 1A g <sup>-1</sup> ] | References |
|---------------------------------------------------------------------|----------------------------------------------------|-------------------------------------------|------------|
| TMO-MOC                                                             | 260 mAh g <sup>-1</sup> at 0.1A g <sup>-1</sup>    | 1800                                      | This work  |
| Mn <sub>2</sub> O <sub>3</sub> @ZnMn <sub>2</sub> O <sub>4</sub> /C | 183.8 mAh g <sup>-1</sup> at 0.2A g <sup>-1</sup>  | 700                                       | 1          |
| MnO <sub>2</sub>                                                    | 275 mAh g <sup>-1</sup> at 0.3 A g <sup>-1</sup>   | 500                                       | 2          |
| Al <sub>0.1</sub> -MnO <sub>2</sub>                                 | 347.6 mAh g <sup>-1</sup> at 0.1 A g <sup>-1</sup> | 1000                                      | 3          |
| Cu-MnO <sub>2</sub>                                                 | 443 mAh g <sup>-1</sup> at 0.1A g <sup>-1</sup>    | 175                                       | 4          |
| δ-MnO <sub>2</sub> NDs                                              | 335 mAh g <sup>-1</sup> at 0.1A g <sup>-1</sup>    | 1000                                      | 5          |
| MO-s                                                                | 392 mAh g <sup>-1</sup> at 0.5A g <sup>-1</sup>    | 1000                                      | 6          |
| KMO                                                                 | 231.97 mAh g <sup>-1</sup> at 0.1A g <sup>-1</sup> | 1400                                      | 7          |
| Al - MnO                                                            | 345 mAh g <sup>-1</sup> at 0.1A g <sup>-1</sup>    | 500                                       | 8          |
| Ag <sub>0.4</sub> Mn <sub>8</sub> O <sub>16</sub>                   | 306 mAh g <sup>-1</sup> at 0.1A g <sup>-1</sup>    | 800                                       | 9          |
| Mo-MnO <sub>2</sub>                                                 | 327 mAh g <sup>-1</sup> at 0.2A g <sup>-1</sup>    | 1000                                      | 10         |
| ZNCMO@N-rGO                                                         | 204.4 mAh g <sup>-1</sup> at 0.01A g <sup>-1</sup> | 900                                       | 11         |
| V <sub>0</sub> -MnO <sub>2</sub> @CNFs                              | 268 mAh g <sup>-1</sup> at 0.05A g <sup>-1</sup>   | 740                                       | 12         |

## References

1. Z. Gao, G. g. Lu, L. c. Cao, Z. x. Zhu, Y. x. Li, F. x. Wei, Z. Ji, Y. w. Sui, J. q. Qi, Q. k. Meng and Y. j. Ren, Rationally designed  $\text{Mn}_2\text{O}_3@\text{ZnMn}_2\text{O}_4/\text{C}$  core-shell hollow microspheres for aqueous zinc-ion batteries, *Dalton Trans.*, 2023, **52**, 1768-1776.
2. J. Wang, J. G. Wang, H. Liu, C. Wei and F. Kang, Zinc ion stabilized  $\text{MnO}_2$  nanospheres for high capacity and long lifespan aqueous zinc-ion batteries, *J. Mater. Chem. A*, 2019, **7**, 13727-13735.
3. Y. Zhao, S. Zhang, Y. Zhang, J. Liang, L. Ren, H. J. Fan, W. Liu and X. Sun, Vacancy-rich Al-doped  $\text{MnO}_2$  cathodes break the trade-off between kinetics and stability for high-performance aqueous Zn-ion batteries, *Energy Environ. Sci.*, 2024, **17**, 1279-1290.
4. J. Zhang, W. Li, J. Wang, X. Pu, G. Zhang, S. Wang, N. Wang and X. Li, Engineering p-Band Center of Oxygen Boosting  $\text{H}^+$  Intercalation in  $\delta\text{-MnO}_2$  for Aqueous Zinc Ion Batteries, *Angew. Chem. Int. Ed.*, 2023, **62**.
5. H. Tang, W. Chen, N. Li, Z. Hu, L. Xiao, Y. Xie, L. Xi, L. Ni and Y. Zhu, Layered  $\text{MnO}_2$  nanodots as high-rate and stable cathode materials for aqueous zinc-ion storage, *Energy Storage Mater.*, 2022, **48**, 335-343.
6. Y. Liu, J. Yao, J. Jiang, Y. Li and Q. Zhu, Exploring the effect of different additives on the preparation of  $\alpha\text{-Mn}_2\text{O}_3/\text{Mn}_3\text{O}_4$  composites and their zinc ion storage performances, *Ionics*, 2023, **29**, 1469-1478.
7. Q. Yang, Y. Chen, Y. Yang, T. Xu, Y. Lin, X. Zhang, J. Wang, Y.-N. Liu and Y. Li, Batch Synthesis of K-Doped  $\alpha\text{-MnO}_2$  Nanorods as Cathode Materials for Aqueous Zinc-Ion Battery, *Ind. Eng. Chem. Res.*, 2023, **62**, 16757-16765.
8. Bo He, Jing Huang, Peng J, Tuan K.A. Hoang, Mei Han, Linjie Li, Lei Zhang, Zhongfeng Gao, Junhong Ma, Jian Zhi, P. Chen, Al doped manganous oxide for high-performance aqueous Zn-ion batteries, *J. Power Sources*, 2023, **554**.
9. B. W. O. Fekadu Wubatu Fenta, Meng-Che Tsai, Nigusu Tirunch Temesgen, Wei-Hsiang Huang, Teshager Mekonnen Tekalign, Yosef Nikodimo, She-huang Wu, Wei-Nien Su, Hongjie Dai, Bing Joe Hwang, Structural engineering of  $\alpha\text{-MnO}_2$  cathode by  $\text{Ag}^+$  incorporation for high capacity aqueous zinc-ion batteries, *J. Power Sources*, 2022, **548**, 232010
10. K. H. Zhen Wang, Qi Wan, Yixing Fang, Xuanhui Qu, and Ping Li, Mo-Pre-Intercalated  $\text{MnO}_2$  Cathode with Highly Stable Layered Structure and Expanded Interlayer Spacing for Aqueous Zn-Ion Batteries, *ACS Appl. Mater. Interfaces*, 2023, 859–869
11. Z. L. Yayuan Tao, Linbin Tang, Xiaoming Pu, Tong Cao, Danhong Cheng, and H. L. Qunjie Xu, YongGang Wan, Yongyao Xia, Nickel and cobalt Co-substituted spinel  $\text{ZnMn}_2\text{O}_4@\text{N-rGO}$  for increased capacity and stability as a cathode material for rechargeable aqueous zinc-ion battery, *Electrochim. Acta*, 2020, **331**, 2020.
12. Q. S. Wei Liu, Rongrong Zhu, Weihao Shi, Fang Zhang, Gaohui Du, Wenqi Zhao, Miao Zhang, and Bingshe Xu, Chemical Lithiation-Induced Oxygen Vacancies in  $\text{MnO}_2$  at Room Temperature for Aqueous Zinc-Ion Batteries, *ACS Appl. Energy Mater.*, 2023, 6689–6699.
